# Supplementary material for: In situ generated nickel nanoparticle-catalyzed carbonylative Suzuki reactions of aryl iodides with arylboronic acids at ambient CO pressure in poly(ethylene glycol)
Source: Royal Society of Chemistry journal article supplement (doi:10.1039/c4ra10739j), 2014-11-13

## Supporting Information

### ***In situ* generated nickel nanoparticles for carbonylative Suzuki reactions of aryl iodides with arylboronic acids at ambient CO pressure in poly(ethylene glycol)**

Yanzhen Zhong, Xinxing Gong, Xiaoshu Zhu, Zhuchao Ni, Haoyang Wang, Jinglin Fu, and Wei Han\*

Jiangsu Collaborative Innovation Center of Biomedical Functional Materials, Jiangsu Key Laboratory of Biofunctional Materials, Key Laboratory of Applied Photochemistry, School of Chemistry and Materials Science, Nanjing Normal University, Wenyuan Road No.1, 210023 Nanjing (China)

E-mail: whhanwei@gmail.com

### List of Contents

|                                                                             |   |
|-----------------------------------------------------------------------------|---|
| 1. General Information -----                                                | 2 |
| 2. General Procedures for Ni-Catalyzed Carbonylative Suzuki Reactions ----- | 2 |
| 3. Analytical Data of Products -----                                        | 3 |
| 4. Hg(0) Poisoning Test -----                                               | 5 |
| 5. TEM Image-----                                                           | 6 |
| 6. References -----                                                         | 7 |
| 7. NMR Spectra for Products -----                                           | 8 |

## 1. General Information

**Reagent Information.** All the aryl halides and the arylboronic acids were purchased from Alfa Aesar and Accela ChemBio Co., Ltd. and were used as received. PEG-400 (bought from Acros) was pre-dried (toluene azeotrope) and pre-deoxygenated. The following **nickel catalyst**, bases, and *t*BuCOOH were used: NiCl<sub>2</sub> (98%, Alfa Aesar), K<sub>3</sub>PO<sub>4</sub> (99%, Alfa Aesar), and *t*BuCOOH (99%, Alfa Aesar).

**Analytical methods.** <sup>1</sup>H and <sup>13</sup>C NMR spectra of solutions in CDCl<sub>3</sub> were recorded on a Bruker Avance 400 instrument. Chemical shifts were expressed in parts per million (ppm) downfield from tetramethylsilane and refer to the solvent signals (CDCl<sub>3</sub>: H 7.24 and C 77.0 ppm). The signals of water were observed at about 1.58 ppm in CDCl<sub>3</sub>, respectively. Abbreviations for signal couplings are: br, broad; s, singlet; d, doublet; t, triplet; m, multiplet; dd, doublet of doublets; dt, triplet of doublets; td, doublet of triplets; tt, triplet of triplets; ddd, doublet of doublet of doublets; tdd, doublet of doublet of triplets. Coupling constants, *J*, were reported in hertz unit (Hz).

## 2. General Procedures for Ni-Catalyzed Carbonylative Suzuki Reactions

*General Procedure:* A 25 mL Schlenk flask was charged with arylboronic acid (0.75 mmol), NiCl<sub>2</sub> (0.01 mmol, 1.4 mg), K<sub>3</sub>PO<sub>4</sub> (1.0 mmol, 218.8 mg), PivOH (0.25 mmol, 25.8 mg), and PEG-400 (2.0 mL) before standard cycles of evacuation and back-filling with dry and pure carbon monoxide. Corresponding aryl iodide (0.5 mmol) was added successively. The mixture was stirred at 80 °C for the indicated time. At the end of the reaction, the reaction mixture was poured into a saturated aqueous NaCl solution (15 mL) and extracted with ethyl acetate (3 × 15 mL). The organic phases were combined, and the volatile components were evaporated in a rotary evaporator. The crude product was purified by column chromatography on silica gel (petroleum ether: diethyl ether = 25 : 1).

In the recycling experiment, the reaction mixture was extracted with ethyl acetate (3 × 15 mL), and the residue was subjected to a second run by charging it with the same substrates as mentioned above without further addition of **NiCl<sub>2</sub>** and PEG 400 1 atm of carbon monoxide.

### 3. Analytical Data of Products

The products, **3aa–3ka**, **3ab–3ad**, **3af**, **3ak**, **3cc**, **3dg**, **3ec**, **3ee**, **3gc**, **3ge**, **3gi**, **3ic**, **3ie**, **3ig**, **3ih**, and **3ma** were identified by comparison of their spectral data with those of our previous reports.<sup>[S1-S2]</sup>

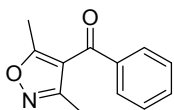

**(3,5-Dimethylisoxazol-4-yl)(phenyl)methanone (31a):** Following *general procedure*, **31a** was isolated as a colorless liquid (90 mg, 90%). Known compound; the NMR spectroscopic data agree with those described in ref..<sup>[S3]</sup> <sup>1</sup>H NMR (400 MHz, CDCl<sub>3</sub>): δ 7.70–7.68 (m, 2 H), 7.59 (tt, *J*=8.0, 1.2 Hz, 1H), 7.50–7.46 (m, 2 H), 2.31 (s, 3 H), 2.28 ppm (s, 3 H); <sup>13</sup>C NMR (100 MHz, CDCl<sub>3</sub>): δ 190.4, 172.3, 159.6, 138.4, 133.2, 128.9, 128.7, 116.4, 13.3, 11.3 ppm.

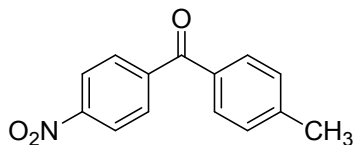

**(4-Nitrophenyl)(*p*-tolyl)methanone (3ae):** Following *general procedure*, **3ae** was isolated as a white solid (108 mg, 90%). Known compound; the NMR spectroscopic data agree with those described in ref..<sup>[S4]</sup> <sup>1</sup>H NMR (400 MHz, CDCl<sub>3</sub>): δ 8.31 (d, *J* = 8.9 Hz, 2H), 7.89 (d, *J* = 8.9 Hz, 2 H), 7.69 (d, *J* = 8.2 Hz, 2 H), 7.30 (d, *J* = 8.2 Hz, 2 H), 2.44 ppm (s, 3 H); <sup>13</sup>C NMR (100 MHz, CDCl<sub>3</sub>): δ 194.5, 149.7, 144.6, 143.3, 133.6, 130.5,

130.3, 129.4, 123.5, 21.7 ppm; mp 123.9–124.4 °C.

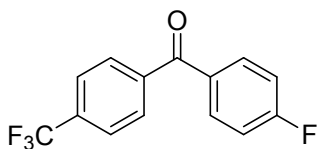

**(4-Fluorophenyl)(4'-(trifluoromethyl)phenyl)methanone (3mc):** Following *general procedure*, **3mc** was isolated as a white solid (95 mg, 71%). Known compound; the NMR spectroscopic data agree with those described in ref.<sup>[S5]</sup> <sup>1</sup>H NMR (400 MHz, CDCl<sub>3</sub>): δ 7.87–7.80 (m, 4H), 7.74 (m, 2H), 7.20–7.13 (m, 2H); <sup>13</sup>C NMR (100 MHz, CDCl<sub>3</sub>): δ 194.0, 165.7 (d, <sup>1</sup>J<sub>CF</sub> = 254 Hz), 140.6, 133.8 (q, <sup>2</sup>J<sub>CF</sub> = 32), 132.9 (d, <sup>4</sup>J=3), 132.8 (d, <sup>3</sup>J<sub>CF</sub> = 9), 129.9, 125.4 (q, <sup>3</sup>J<sub>CF</sub> = 4), 123.6 (q, <sup>1</sup>J<sub>CF</sub> = 272 Hz), 115.8 (d, <sup>2</sup>J<sub>CF</sub>=22) ppm; mp 96.9–97.6 °C.

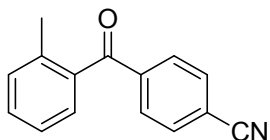

**4-(2-Methylbenzoyl)benzonitrile (3eh):** Following *general procedure*, **3eh** was isolated as a colorless liquid (96 mg, 87%). Known compound (CAS: 913485-57-1); <sup>1</sup>H NMR (400 MHz, CDCl<sub>3</sub>): δ 7.86 (d, *J*=8.0 Hz, 2 H), 7.74 (d, *J*=8.0 Hz, 2 H), 7.44–7.40 (m, 1 H), 7.31–7.23 (m, 3 H), 2.34 ppm (s, 3 H); <sup>13</sup>C NMR (100 MHz, CDCl<sub>3</sub>): δ 196.8, 141.1, 137.5, 136.9, 132.3, 131.4, 131.2, 130.3, 128.9, 125.4, 117.9, 116.2, 20.1 ppm.

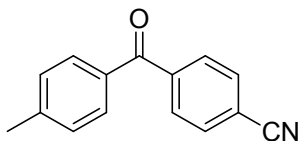

**4-(4-Methylbenzoyl)benzonitrile (3gh):** Following *general procedure*, **3gh** was isolated as a white solid (101 mg, 92%). Known compound; the NMR spectroscopic data agree with those described in ref.<sup>[S6]</sup> <sup>1</sup>H NMR (400 MHz, CDCl<sub>3</sub>): δ 7.83 (d, *J*=8.0 Hz, 2 H),

7.76 (d,  $J=8.0$  Hz, 2 H), 7.67 (d,  $J=8.0$  Hz, 2 H), 7.29 (d,  $J=8.0$  Hz, 2 H), 2.43 ppm (s, 3 H);  $^{13}\text{C}$  NMR (100 MHz,  $\text{CDCl}_3$ ):  $\delta$  196.8, 144.4, 141.6, 133.6, 132.1, 130.3, 130.1, 129.3, 118.0, 115.3, 21.7 ppm.

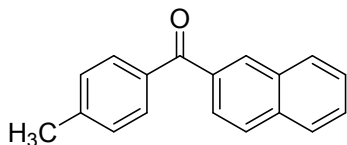

**Naphthalen-2-yl(p-tolyl)methanone (3gj):** Following *general procedure*, **3gj** was isolated as a white solid (92 mg, 75%). Known compound; the NMR spectroscopic data agree with those described in ref.<sup>[S7]</sup>  $^1\text{H}$  NMR (400 MHz,  $\text{CDCl}_3$ ):  $\delta$  8.23 (s, 1H), 7.94–7.88 (m, 4 H), 7.76 (d,  $J=8.0$  Hz, 2H), 7.62–7.51 (m, 2H), 7.30 (d,  $J=8.0$  Hz, 2 H), 2.45 (s, 3 H).  $^{13}\text{C}$  NMR (100 MHz,  $\text{CDCl}_3$ ):  $\delta$  196.5, 143.2, 135.2, 132.3, 131.6, 130.4, 129.3, 129.0, 128.2, 128.1, 127.8, 126.7, 125.8, 21.7 ppm; mp 81.6–82.2 °C.

#### 4. Hg(0) Poisoning Test

As *general procedure*, a reactions of 1-iodo-4-nitrobenzene **1a** (0.5 mmol, 127.0 mg), phenylboronic acid **2a** (0.75 mmol, 92.4 mg),  $\text{NiCl}_2$  (0.01 mmol, 1.4 mg),  $\text{K}_3\text{PO}_4$  (1.0 mmol, 218.8 mg), and  $t\text{BuCO}_2\text{H}$  (0.25 mmol, 25.8 mg) in PEG-400 (2.0 mL), with the addition of Elemental mercury (2mmol, 100eq, 401.2 mg) (relative to **nickel**) was conducted. Following the reaction for 3 h at 80 °C, the isolated yield of the desired product **3aa** was trace, suggesting that the reaction is completely inhibited by the introduction of Hg(0).



## 6. References

- [S1] Zhong, Y. Z.; Han, W. *Chem. Commun.* **2014**, *50*, 3874.
- [S2] Zhou, Q.; Wei, S. H.; Han, W. *J. Org. Chem.* **2014**, *79*, 1454.
- [S3] Sauers, R. R.; Hadel, L. M.; Scimone, A. A.; Stevenson, T. A. *J. Org. Chem.* **1990**, *55*, 4011.
- [S4] C. M. Qin, J. X. Chen, H. Y. Wu, J. Cheng, Q. Zhang, B. Zuo, W. K. Su, J. C. Ding, *Tetrahedron Lett.* **2008**, *49*, 1884.
- [S5] Posternak, A. G.; Garlyauskayte, R. Y.; Yagupolskii, L. M. *Tetrahedron Lett.* **2009**, *50*, 446.
- [S6] Karthikeyan, J.; Parthasarathy, K.; Cheng, C.-H. *Chem. Commun.* **2011**, *47*, 10461.
- [S7] Rao, M. L. N.; Venkatesh, V.; Banerjee, D. *Tetrahedron*, **2007**, *63*, 12917.

## 7. NMR Spectra of Products

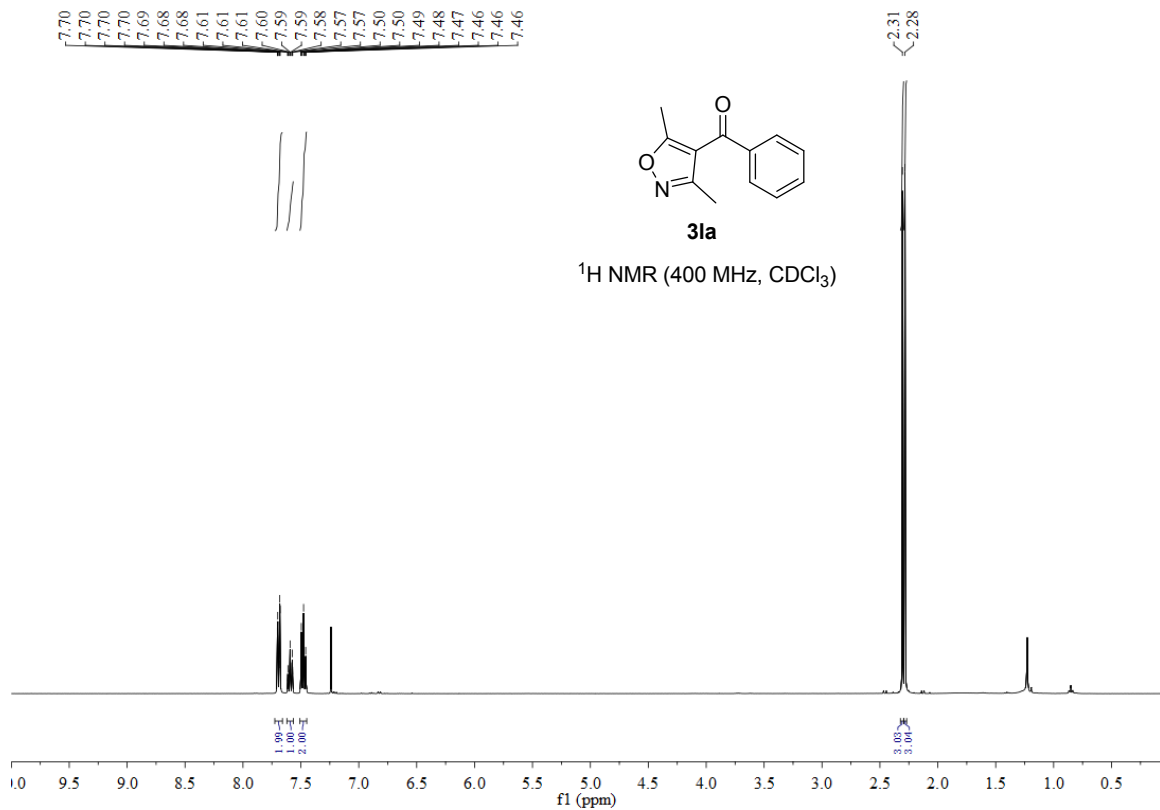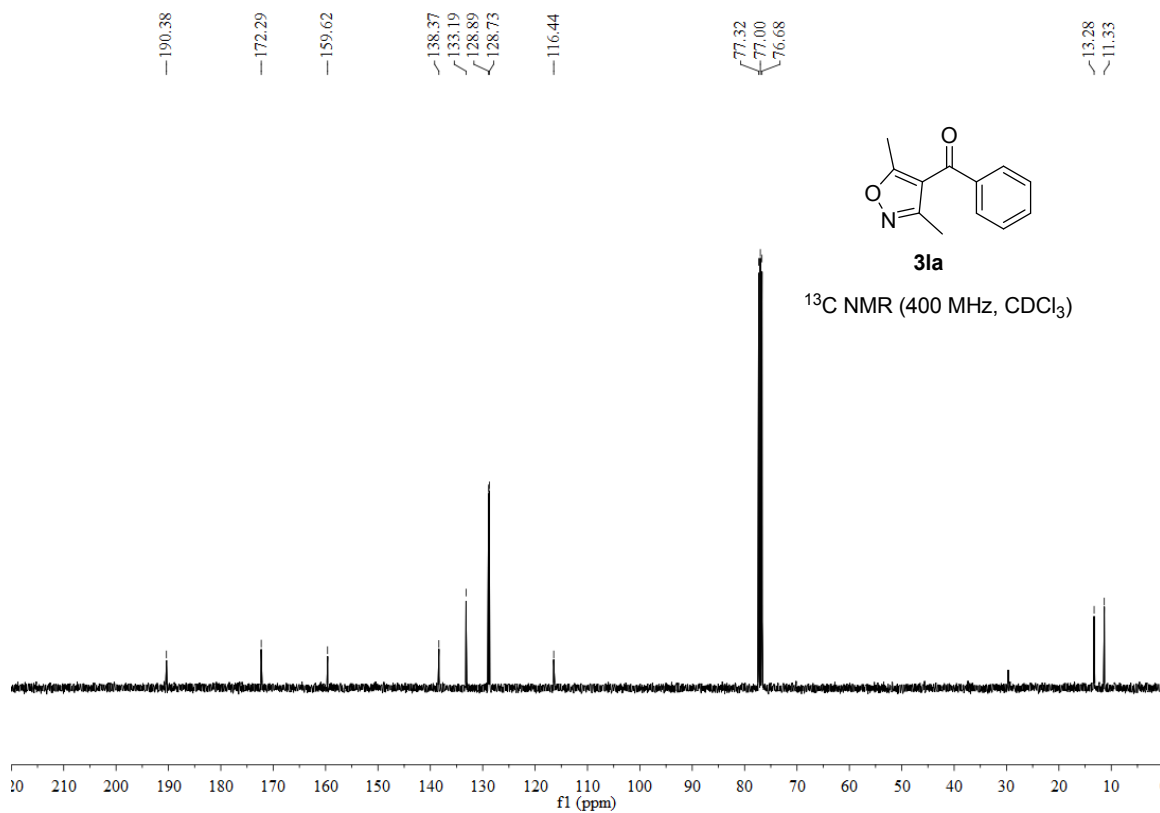



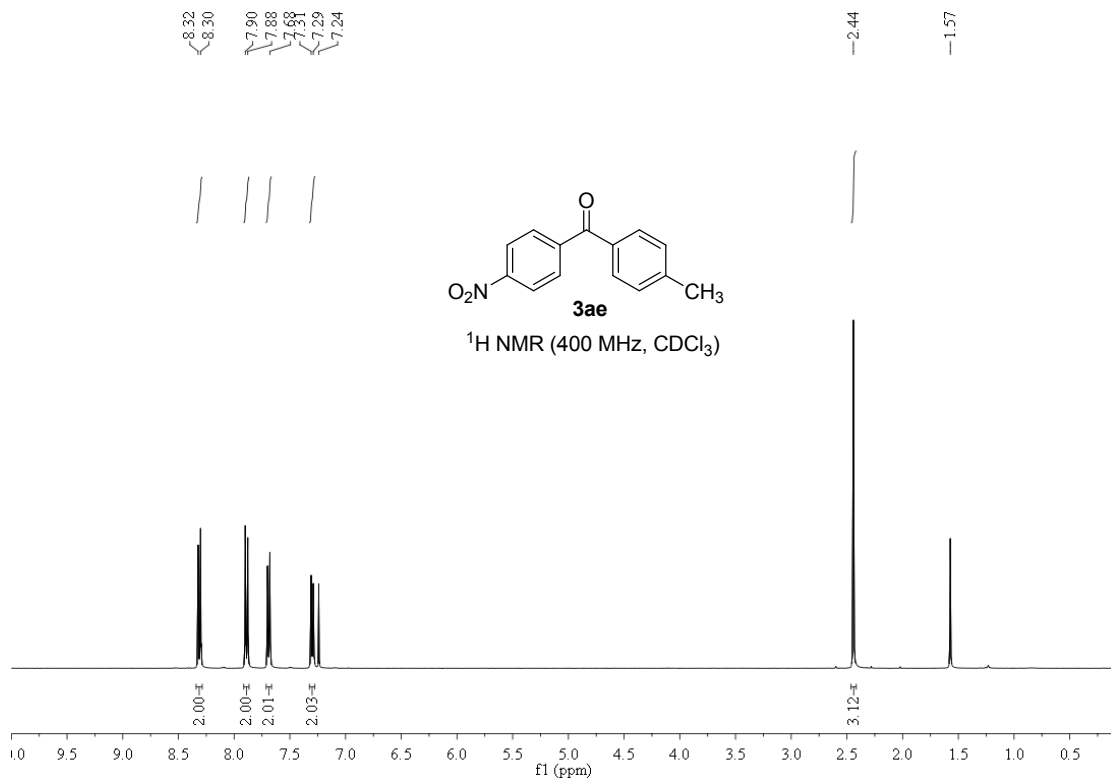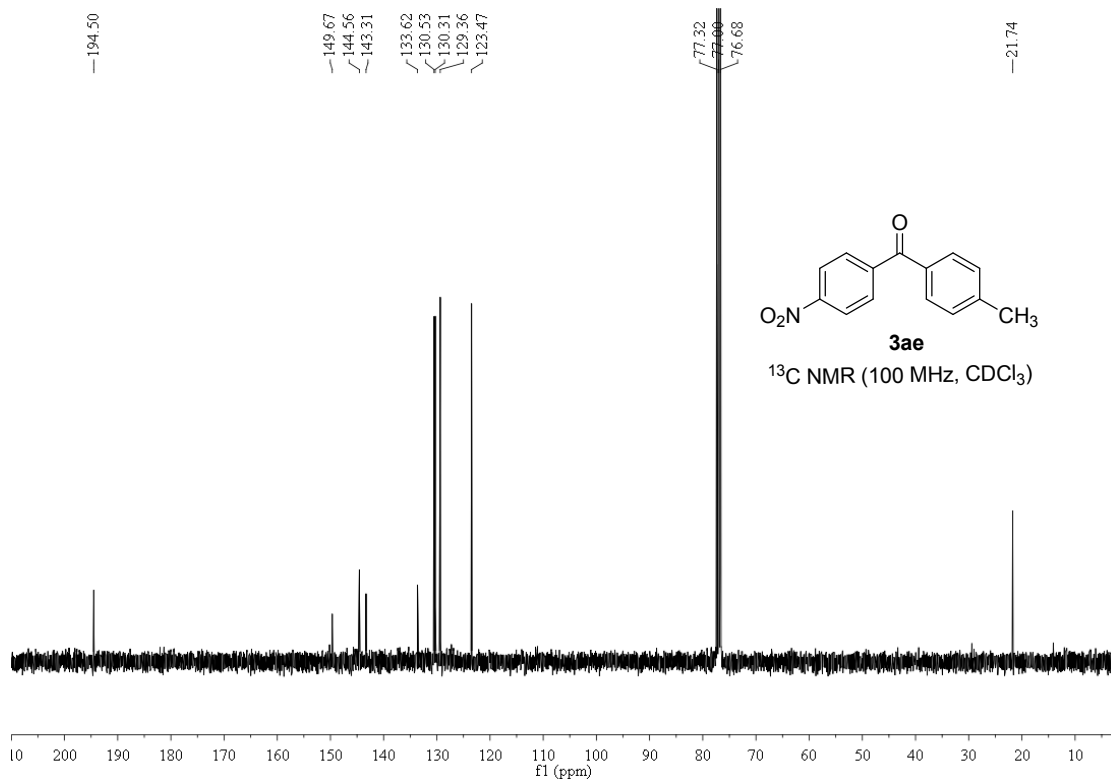

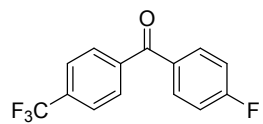

**3mc**

<sup>1</sup>H NMR (100 MHz, CDCl<sub>3</sub>)

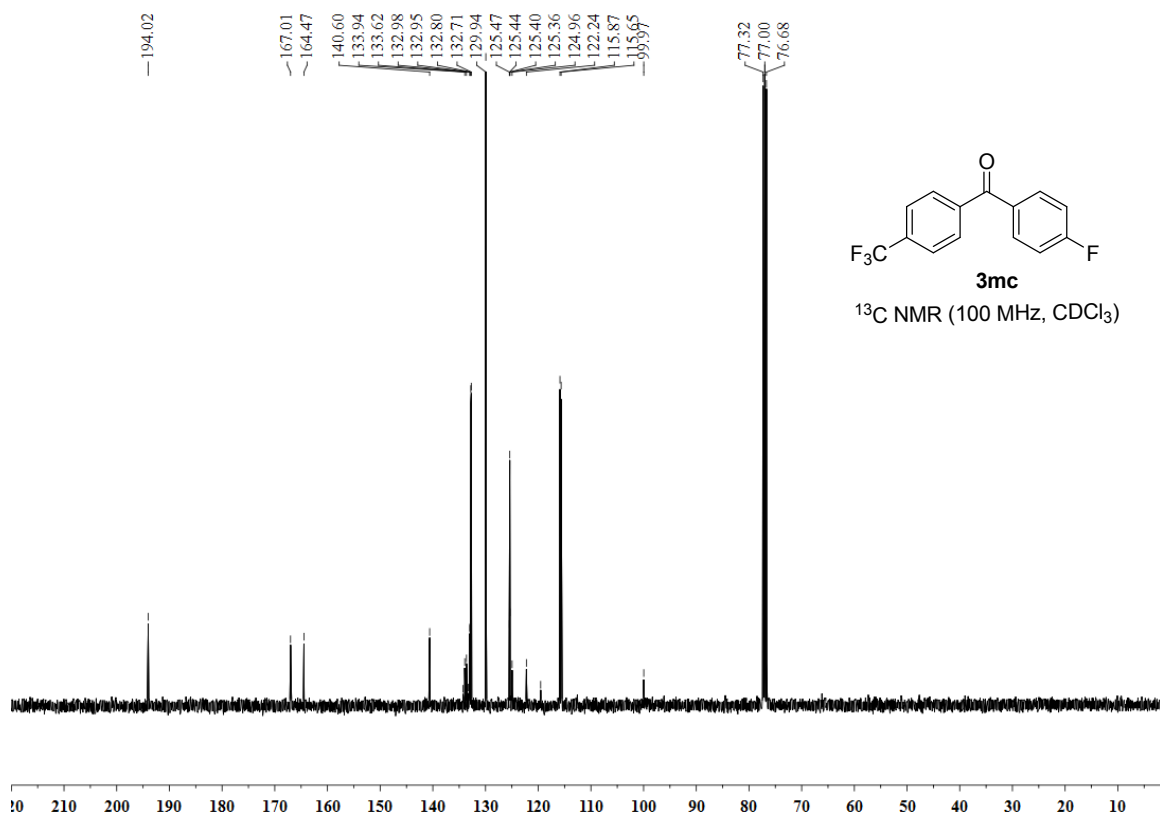

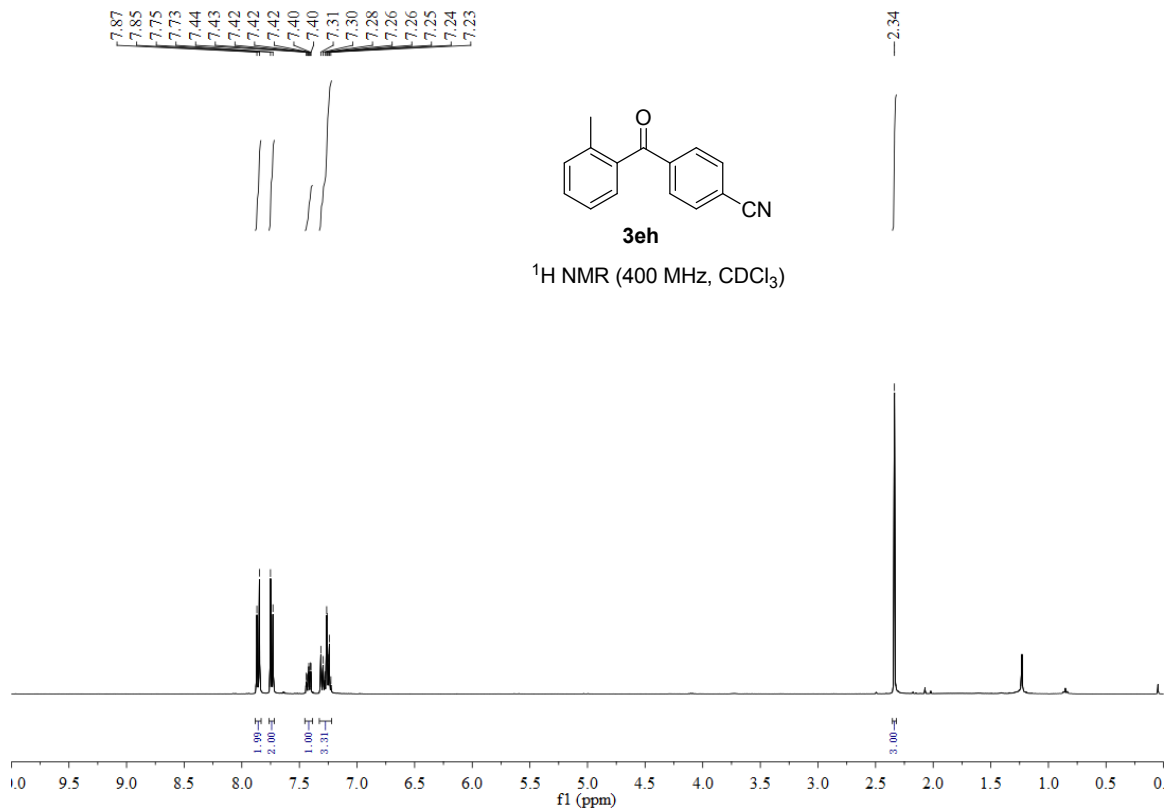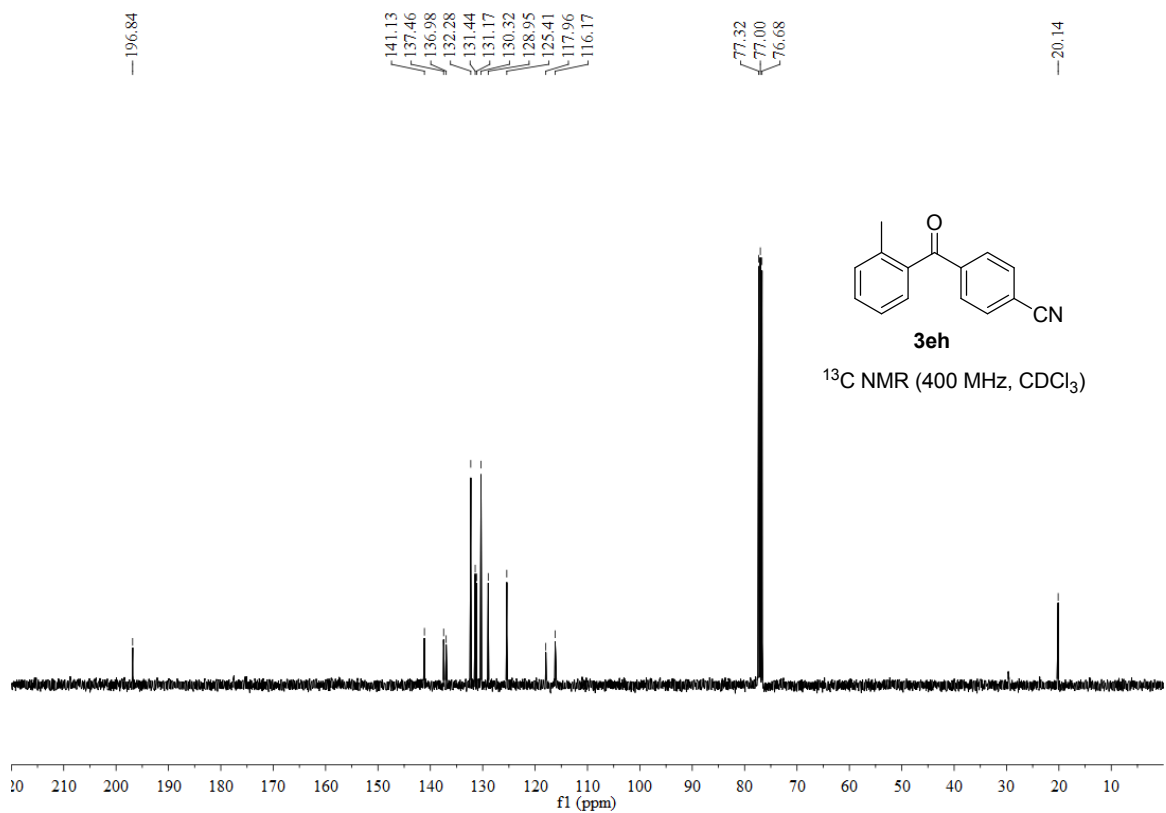

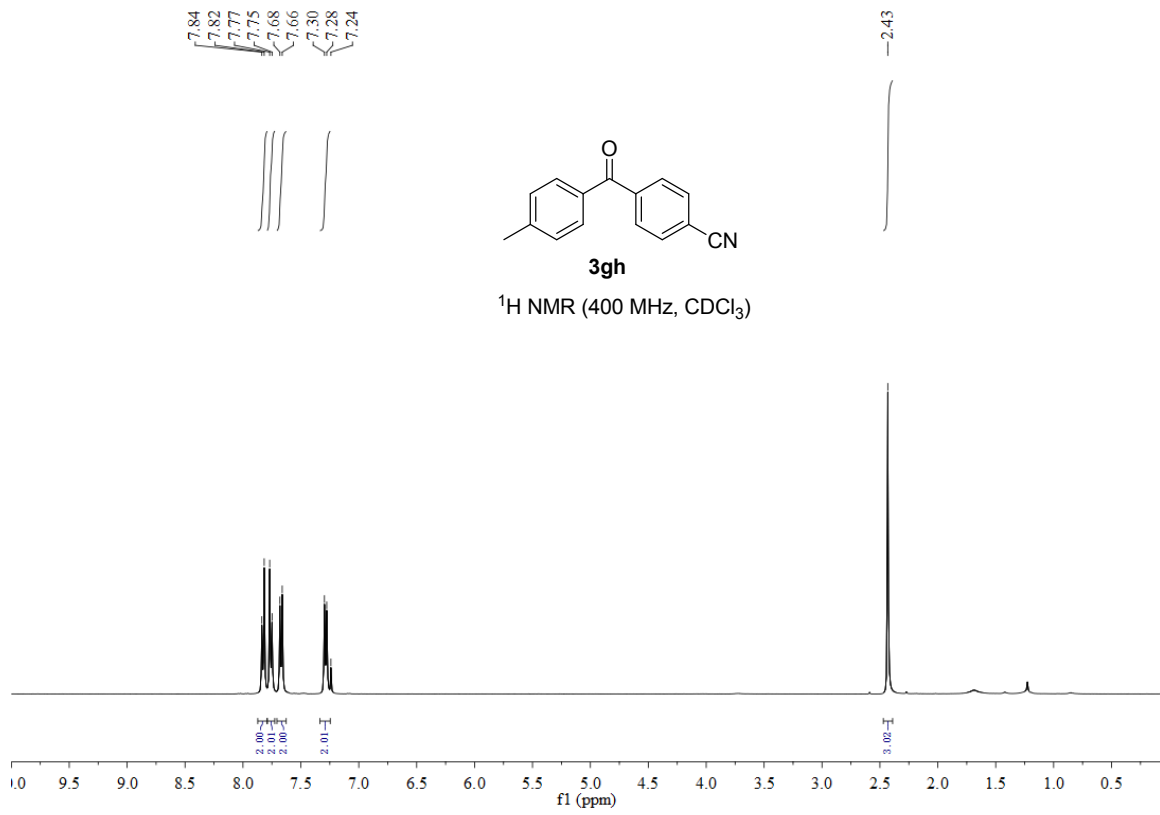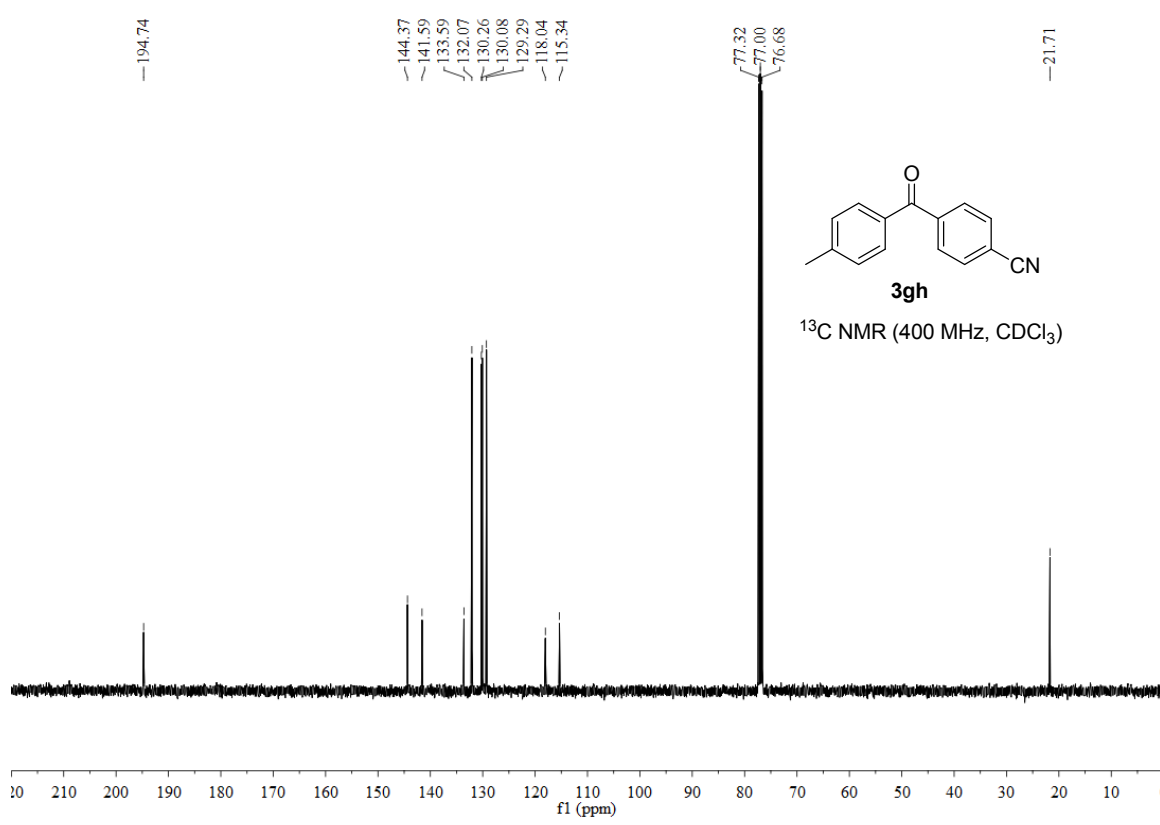

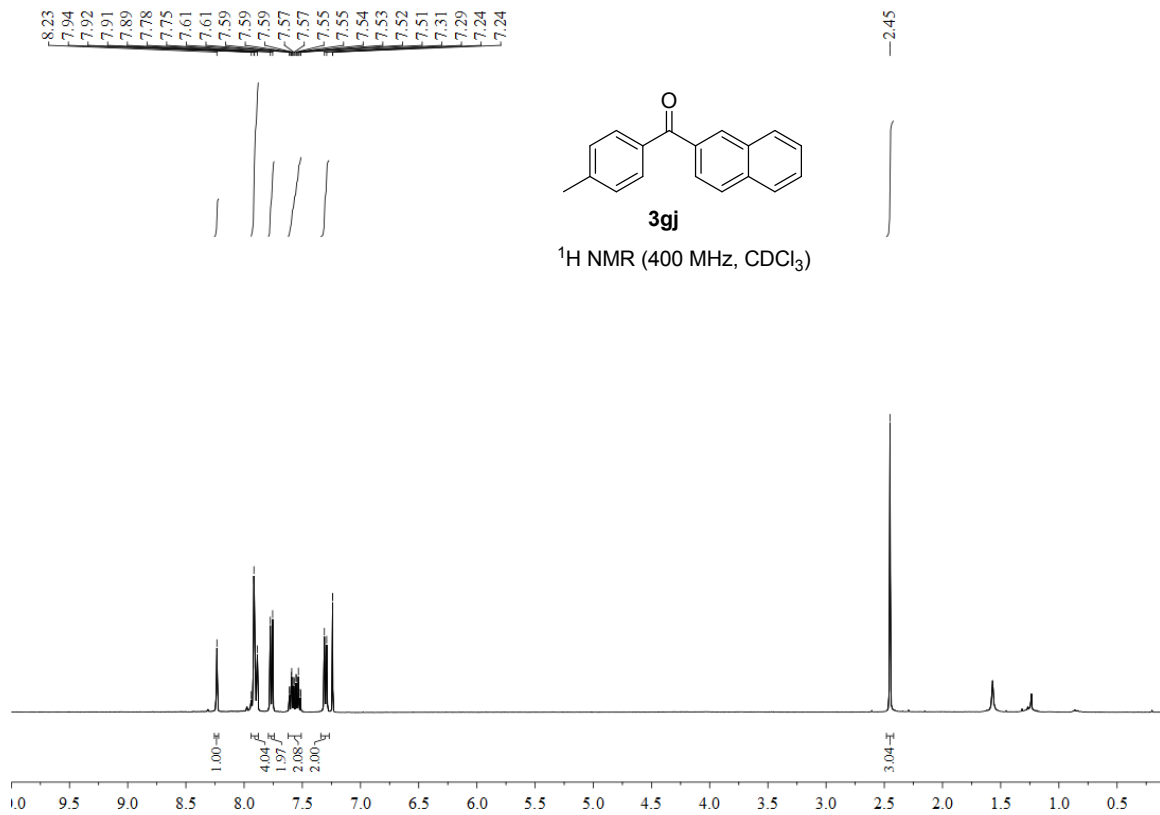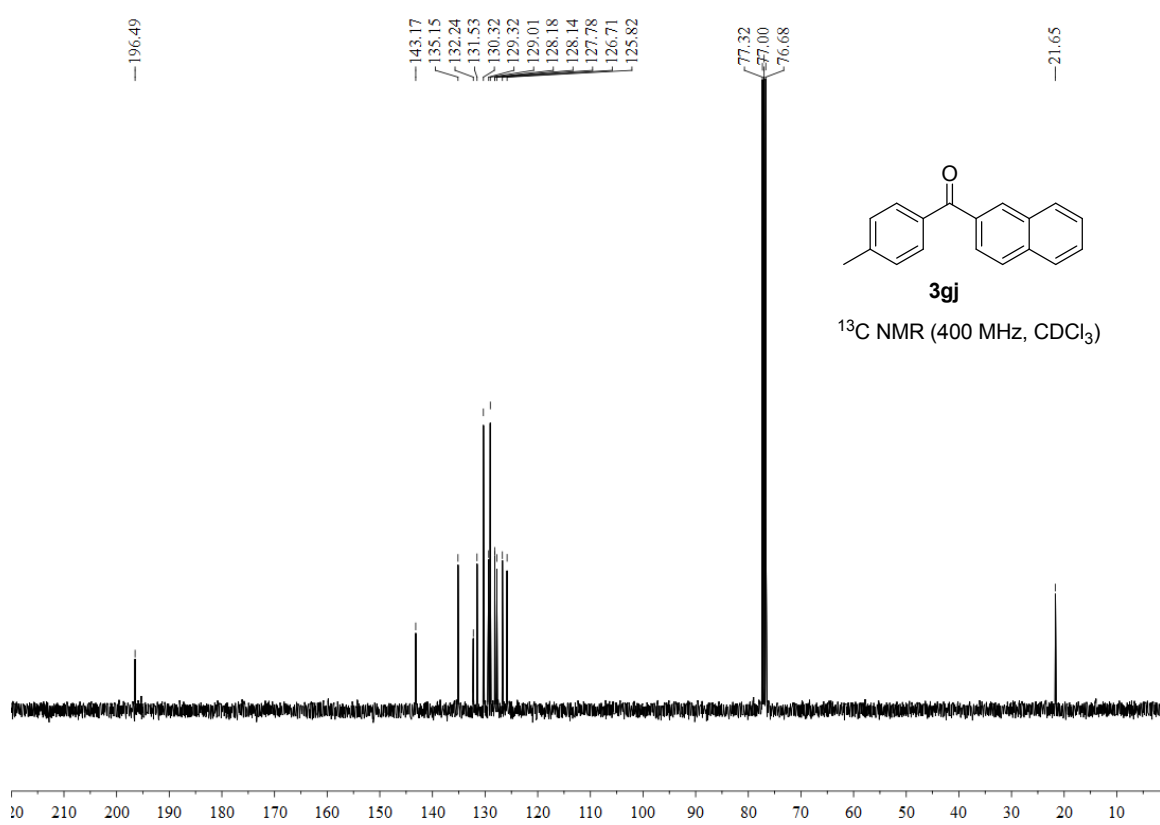

Supplement: c4ra10739j1.pdf [file c4ra10739j1.pdf]
